# Supplementary material for: Systematic Identification of Plasmodium Falciparum Sporozoite Membrane Protein Interactions Reveals an Essential Role for the p24 Complex in Host Infection
Source: PubMed Central journal article supplement (PMC7950211; doi:10.1074/mcp.ra120.002432), 2021-01-27
Supplement: mmc1.pdf [file mmc1.pdf]

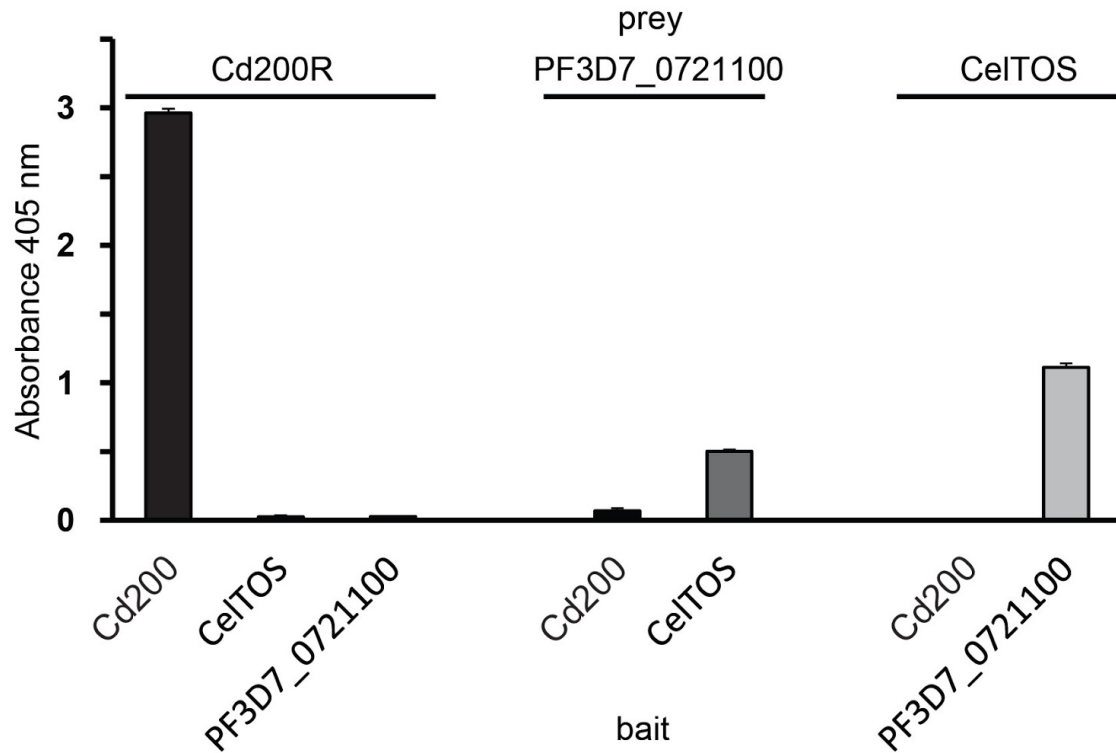

**Figure S1. Confirmation of the interaction between *P. falciparum* CelTOS and PF3D7\_0721100 using a modified avidity-based interaction assay.** CelTOS and PF3D7\_0721100 were shown to directly interact in both bait-prey orientations using a modified avidity-based interaction assay. The entire ectodomains of *P. falciparum* CelTOS and PF3D7\_0721100 were expressed as monomeric biotinylated bait proteins and captured on a streptavidin-coated microtitre plate. Highly avid tetrameric prey binding probes were made by complexing the biotinylated monomers to a streptavidin alkaline phosphatase conjugate and adding normalised amounts to bait-coated wells. Interactions were quantified by adding phosphatase substrate and measuring the absorbance at 405 nm. The rat Cd200-Cd200R interaction was used as a positive control (+); negative control bait (-) was Cd200. Bars indicate means  $\pm$  SD;  $n = 3$ . Shown are the results from one of two independent experiments with similar results.

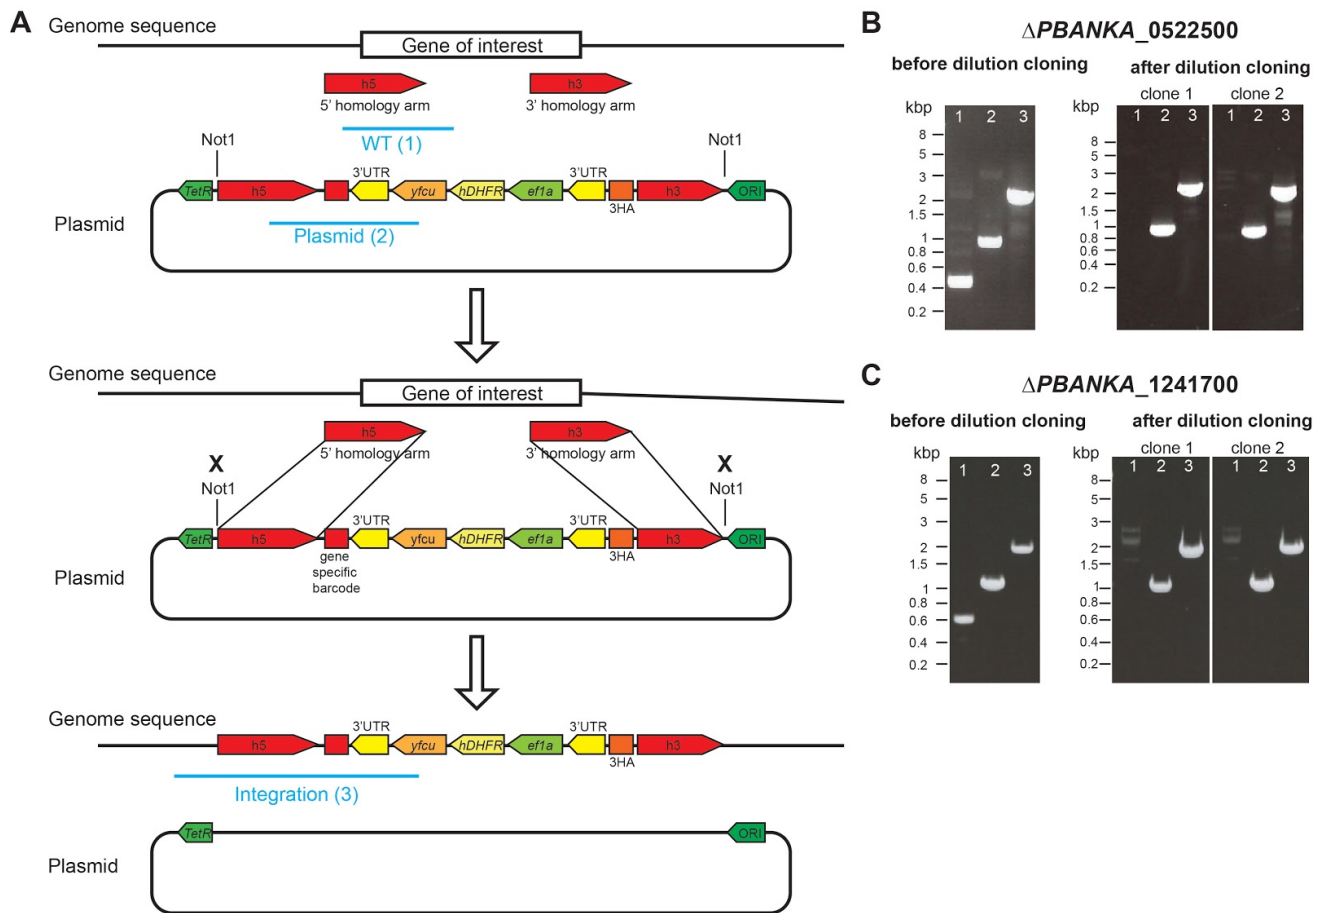

**Figure S2. Overview of cloning strategy for  $\Delta PBANKA_{0522500}$  and  $\Delta PBANKA_{1241700}$  vectors and genotyping of parasites.** (A) Generalised schematic overview of the cloning strategy used to generate plasmids used to target *PBANKA\_{0522500}* and *PBANKA\_{1241700}* genes in *P. berghei* parasites. 5' and 3' homology arms were amplified from genomic DNA and cloned into the pR6K attL1-3xHA-hDHFR-yfcu-attL2 plasmid backbone and transfected into *P. berghei* after digestion with the NotI restriction enzyme (X) to release the gene targeting cassette. The cassette is integrated into the genome by homologous recombination and replaces the gene of interest. The fragments generated by PCR to confirm deletion of the WT locus and integration of the plasmid into the genome are indicated in blue. (B, C) Genomic DNA was isolated from parasites before (left) and after (right) dilution cloning of  $\Delta PBANKA_{0522500}$  (B), and  $\Delta PBANKA_{1241700}$  (C) parasites. Polymerase chain reactions were performed with primers designed to detect the WT locus (1), the transfection vector (2) and the recombinant locus (3). After dilution cloning, the WT genes were not detected demonstrating that the parasite lines are clonal and only contain recombinant parasites.

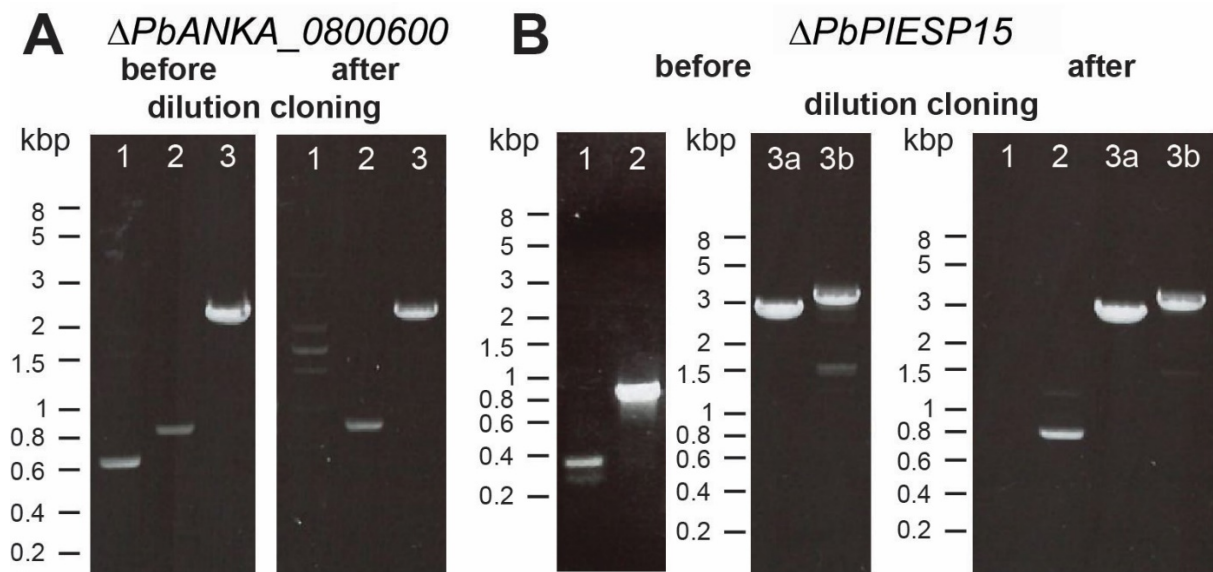

**Figure S3. Genotyping of  $\Delta PbANKA_{0800600}$  and  $\Delta PbPIESP15$  parasites.** Genomic DNA was isolated from  $\Delta PbANKA_{0800600}$  (A) and  $\Delta PbPIESP15$  (B) parasites before (left) and after (right) dilution cloning. Primers were designed to detect the WT locus (1), the transfection vector (2) and the integrated transfection cassette (3). After dilution cloning, the WT genes were not detected, demonstrating that the parasite lines are clonal and only contain recombinant parasites. Anticipated recombination at the *PIESP15* locus was confirmed with two PCR reactions, each amplifying one half of the required sequence (3a, 3b).

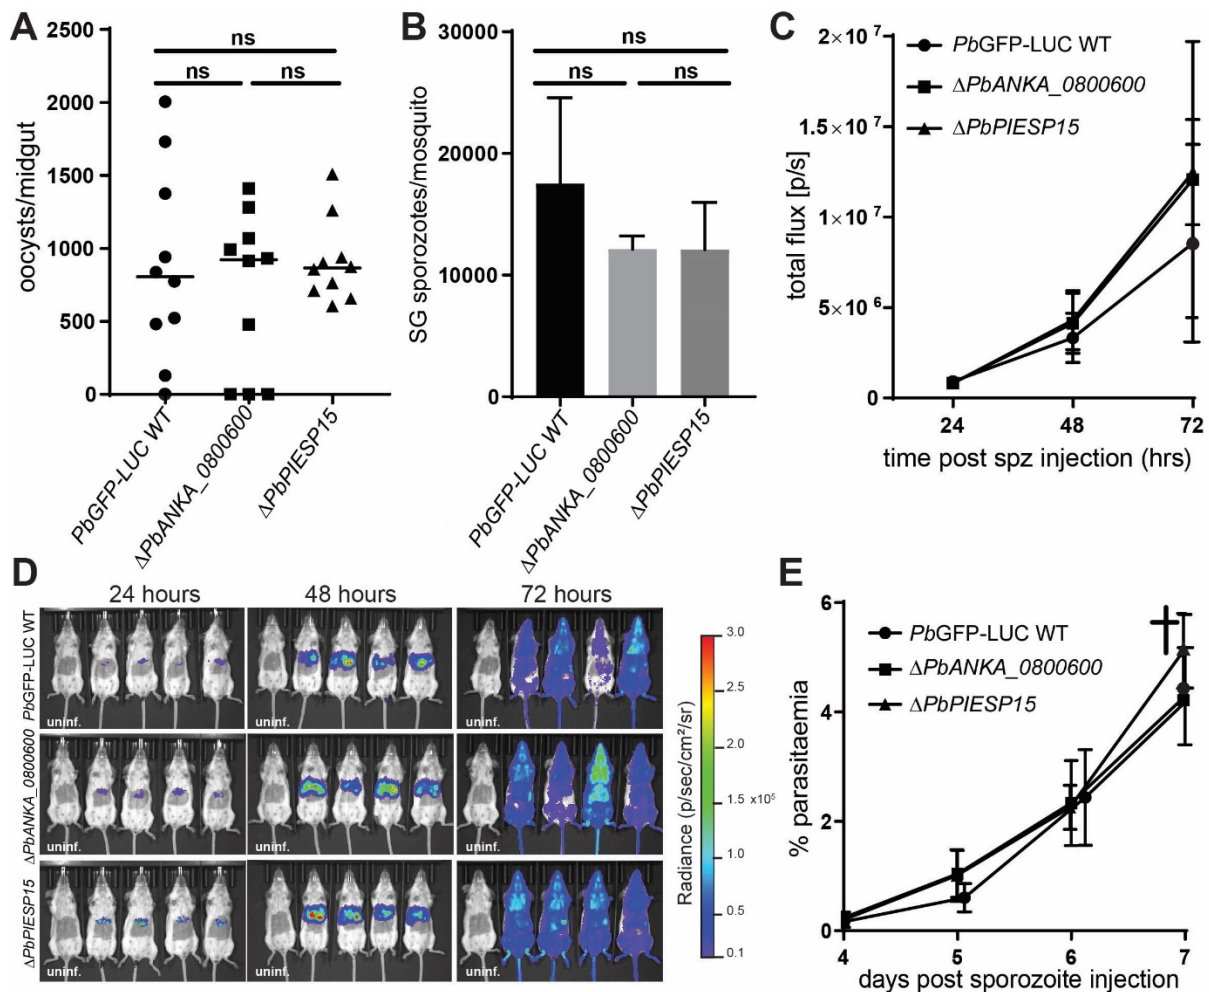

**Figure S4.  $\Delta$ PbPIESP15 and  $\Delta$ PbANKA\_0800600 parasites exhibit no overt infection phenotype.** (A) The number of oocysts per midgut in *A. stephensi* mosquitoes infected with *P. berghei* genetically targeted for *PbPIESP15* and *PbANKA\_0800600* were not significantly different from the GFP-luciferase transgenic wild-type parental strain. Data points are individual midguts; median is indicated and statistical comparisons were performed using the Mann-Whitney Test; P-values > 0.05 were considered non-significant (ns). (B) The average number of salivary gland (SG) sporozoites per mosquito is plotted. 15-20 mosquitoes were dissected and sporozoites isolated from the salivary glands were counted in a hemocytometer; columns represent the average number of sporozoites per mosquito taken from four independent experiments. Shown is the mean + SD (C)  $\Delta$ PbPIESP15 and  $\Delta$ PbANKA\_0800600 parasites exhibit no overt infection phenotype compared to wild-type control. Groups of four mice were infected by intravenous administration of 5000 isolated salivary gland sporozoites and the resulting parasitaemia quantified using luciferase-based bioluminescence of the entire animal by an *in vivo* imaging system. Data points are mean  $\pm$  SD;  $n = 4$ . (D) Normalised bioluminescence images collected on each day after infection; the left-most animal in each cohort is an uninfected control. (E) The asexual blood stage parasitaemia in  $\Delta$ PbPIESP15 and  $\Delta$ PbANKA\_0800600 parasites was quantified by microscopic analysis of blood smears taken between day four and seven post infection and showed no difference compared to the wild-type control. All animals were culled on day 7 because they showed symptoms of disease (indicated by the cross) Shown are the results from one of three independent experiments with similar results. Data points are mean  $\pm$  SD;  $n = 4$ .

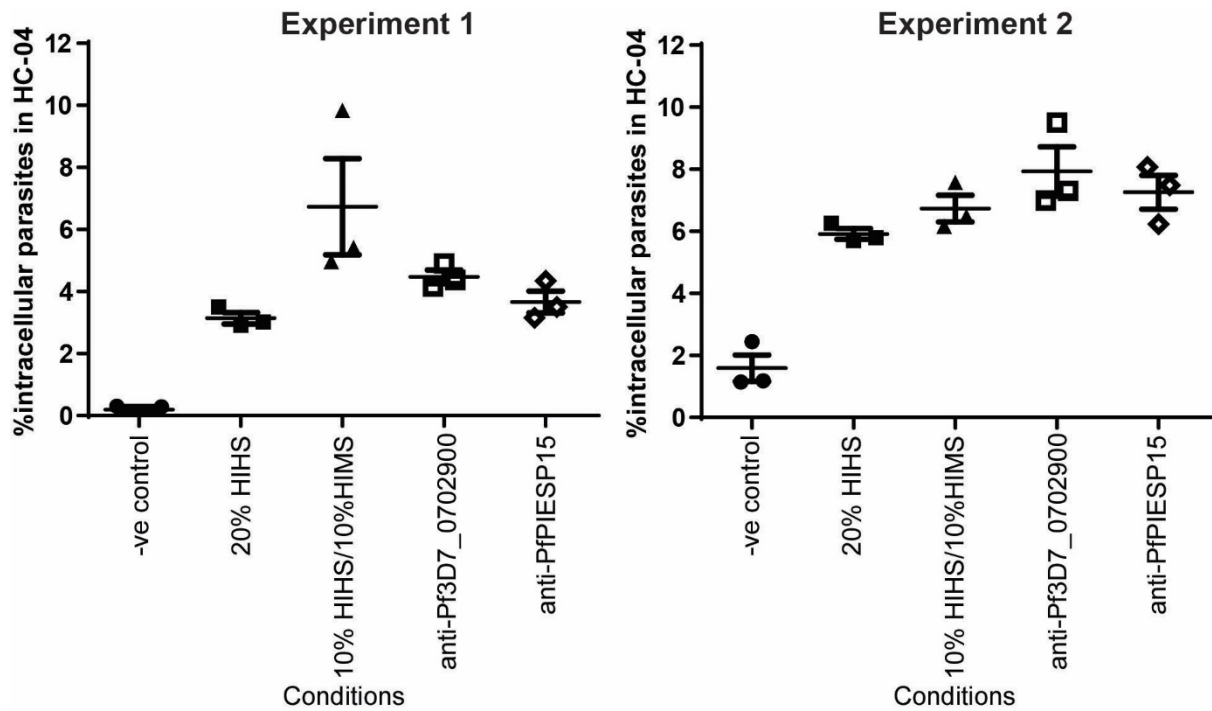

**Figure S5. Polyclonal antisera elicited against Pf3D7\_0702900 and PfPIESP15 do not affect *P. falciparum* NF-135 sporozoite invasion of the human HC-04 cell line.** *P. falciparum* NF-135 sporozoites were incubated with either 20% heat inactivated human serum (HIHS) or a mixture of 10% human serum and 10% mouse serum (10% HIHS/10% HIMS), 10% anti-Pf3D7\_0702900 or anti-PfPIESP15 polyclonal antiserum before being incubated with HC-04 cells for three hours. Cells incubated with media only (no sporozoites) were used as negative control. Invasion was quantified as percentage of intracellular parasites by FACS analysis of cells stained with an anti-CSP antibody. Data points show mean  $\pm$  SEM,  $n = 3$ . Data from two independent experiments are shown and comparison of the results using a one-way ANOVA showed no significant difference between anti-Pf3D7\_0702900 or anti-PfPIESP15 treated sporozoites and controls.

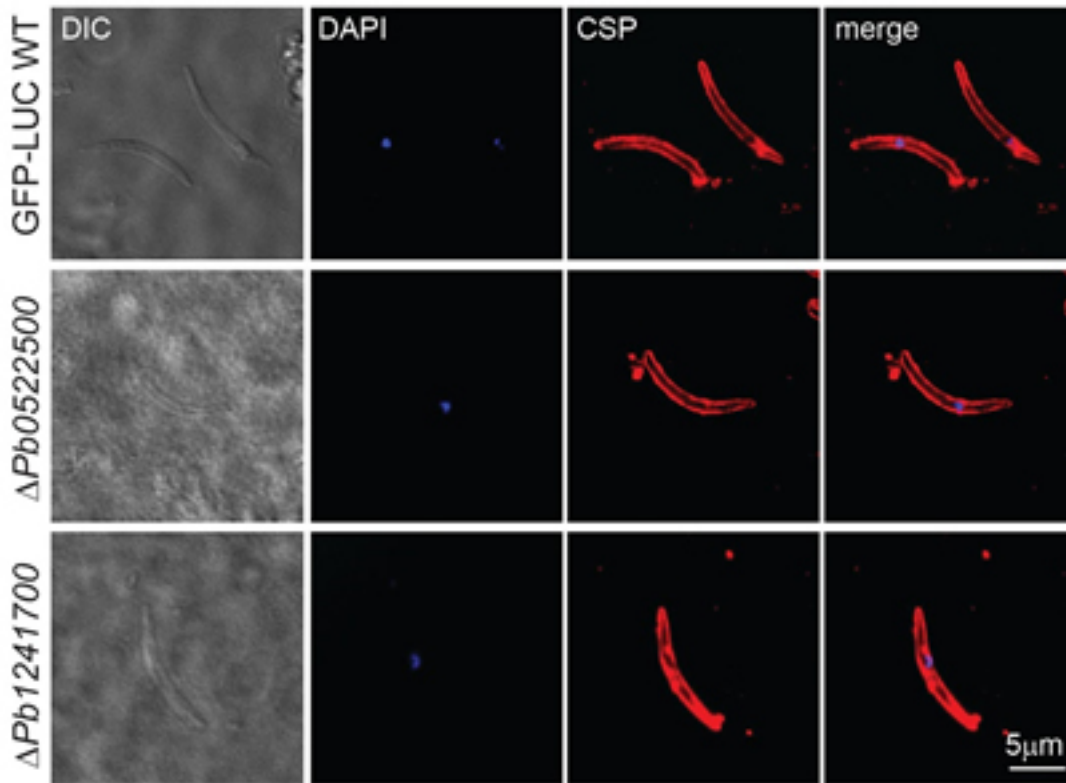

**Figure S6. The amount and localisation of CSP protein does not differ between *P. berghei* GFP-LUC WT and  $\Delta Pb0522500$  and  $\Delta Pb1241700$  sporozoites.** Air-dried and Triton-treated *P. berghei* GFP-LUC WT and  $\Delta Pb0522500$  and  $\Delta Pb1241700$  sporozoites were stained with a monoclonal antibody against the CSP protein. No overt difference could be observed in the staining pattern showing that the amounts and subcellular localisation of the GPI-anchored CSP protein is not affected in parasites lacking either the *Pb0522500* or *Pb1241700* gene.

**Table S1. A library of sporozoite surface and secreted proteins.** The protein sequences from the *P. falciparum* reference strain 3D7 were truncated to remove their endogenous signal peptides and transmembrane domain or GPI anchor if present. The region of the protein (typically the full length ectodomain) which was codon optimised and synthesised for expression is identified by the N- and C-terminal residues and their position. The constructs were transfected transiently into HEK293 cells using a non-commercial transfection agent (PE) and expression levels are based on the recombinant proteins'  $\beta$ -lactamase activity or activity in ELISA (in the case of merozoite proteins, previously published). Key: n.d. = not detected; subcloning failed = insert failed to be cloned into expression plasmid; synthesis failed = gene synthesis repeatedly failed; n/a = insert not subcloned into bait expression vector

| Localisation  | no. | Addgene ID | Group                                 | Localisation                                                                  | Accession Number | Protein Description                                                   | Synonyms                             | Region Expressed          | Expression level prey | Expression level bait                                         |
|---------------|-----|------------|---------------------------------------|-------------------------------------------------------------------------------|------------------|-----------------------------------------------------------------------|--------------------------------------|---------------------------|-----------------------|---------------------------------------------------------------|
| Transmembrane | 1   | 110954     | Ookinete                              | anchored component of plasma membrane (cell surface)                          | PF3D7_1346800    | 6-cysteine protein (P47)                                              | PF47, PF547                          | E27-T418                  | very low              | n.d.                                                          |
|               | 2   | 110955     | Midgut Sporozoite                     | Apicoplast                                                                    | PF3D7_1213500    | integral membrane protein GPR180, putative                            |                                      | K28-E430                  | n.d.                  | high                                                          |
|               | 3   | 110956     | Midgut Sporozoite                     | ER, IMC, plasma membrane                                                      | PF3D7_0918000    | secreted acid phosphatase (GAP50)                                     | PFGAP50, PFSAP, SAP                  | Q26-P360                  | high                  | high                                                          |
|               | 4   |            | Midgut Sporozoite                     | anchored component of external side of plasma membrane                        | PF3D7_0718300    | CRMP2                                                                 | PFICRMP2                             | T28-M1735                 | subcloning failed     | subcloning failed                                             |
|               | 5   |            | Midgut Sporozoite                     | anchored component of external side of plasma membrane                        | PF3D7_0911300    | CRMP1                                                                 | PFICRMP1                             | L11-M2387                 | subcloning failed     | subcloning failed                                             |
|               | 6   | 110957     | Midgut Sporozoite                     | anchored component of plasma membrane                                         | PF3D7_1346700    | 6-cysteine protein (P48/45)                                           | PF548/45                             | N28-S427                  | low                   | n.d.                                                          |
|               | 7   | 110958     | Midgut Sporozoite                     | unknown                                                                       | PF3D7_0103900    | parasite-infected erythrocyte surface protein (PIESP15)               |                                      | K25-K539                  | medium                | low                                                           |
|               | 8   | 110959     | Midgut Sporozoite                     | unknown                                                                       | PF3D7_0910300    | conserved Plasmodium protein, unknown function                        |                                      | E29-S368                  | medium                | high                                                          |
|               | 9   | 110960     | Midgut Sporozoite                     | unknown                                                                       | PF3D7_1105300    | conserved Plasmodium protein, unknown function                        |                                      | Y22-L678                  | n.d.                  | n.d.                                                          |
|               | 10  | 110961     | Midgut and Salivary gland sporozoites | Apicoplast                                                                    | PF3D7_1442600    | TRAP-like protein,sporozoite-specific transmembrane protein S6 (TREP) | S6, UOS3                             | M1-P384                   | n.d.                  | low                                                           |
|               | 11  | 110962     | Midgut and Salivary gland sporozoites | Rhoptries                                                                     | PF3D7_1452000    | rhoptry neck protein 2 (RON2)                                         | PFRON2                               | S21-V2072                 | n.d.                  | n.d.                                                          |
|               | 12  | 110963     | Midgut and Salivary gland sporozoites | Micronemes                                                                    | PF3D7_1147800.1  | merozoite adhesive erythrocytic binding protein (MAEBL)               | PFMAEBL                              | I21-N1987                 | n.d.                  | n.d.                                                          |
|               | 13  | 110964     | Midgut and Salivary gland sporozoites | Cell surface                                                                  | PF3D7_0104000    | thrombospondin related sporozoite protein (TRSP)                      | sporozoite stage TSP1 domain protein | D20-T134                  | low                   | medium                                                        |
|               | 14  | 110965     | Midgut and Salivary gland sporozoites | Host cell cytosol                                                             | PF3D7_1463900    | EF-hand calcium binding domain containing protein, putative           |                                      | N22-A447                  | very low              | low                                                           |
|               | 15  | 110966     | Midgut and Salivary gland sporozoites | unknown                                                                       | PF3D7_0912400    | alkaline phosphatase, putative                                        |                                      | Q21-T403                  | n.d.                  | n.d.                                                          |
|               | 16  |            | Midgut and Salivary gland sporozoites | unknown                                                                       | PF3D7_1229300    | conserved Plasmodium protein                                          |                                      | L20-S890                  | synthesis failed      | n/a                                                           |
|               | 17  | 110967     | Midgut and Salivary gland sporozoites | unknown                                                                       | PF3D7_1310500    | conserved Plasmodium protein                                          |                                      | D30-P147                  | very low              | high                                                          |
|               | 18  | 110968     | Midgut and Salivary gland sporozoites | unknown                                                                       | PF3D7_1350600    | conserved Plasmodium protein                                          |                                      | M22-T196                  | low                   | n.d.                                                          |
|               | 19  | 110969     | Midgut and Salivary gland sporozoites | unknown                                                                       | PF3D7_1352500    | thioredoxin-related protein, putative                                 |                                      | Q23-P170                  | low                   | high                                                          |
|               | 20  | 110970     | Midgut and Salivary gland sporozoites | unknown                                                                       | PF3D7_1462300    | conserved Plasmodium protein                                          |                                      | I19-P1149                 | n.d.                  | low                                                           |
|               | 21  | 110971     | Salivary gland sporozoites            | Apicoplast                                                                    | PF3D7_0902900    | conserved Plasmodium protein                                          |                                      | S24-D54                   | medium                | high                                                          |
|               | 22  | 110972     | Salivary gland sporozoites            | Apicoplast                                                                    | PF3D7_1333300    | transmembrane protein Tmp21 homologue, putative                       |                                      | Y18-A178                  | medium                | low                                                           |
|               | 23  | 110973     | Salivary gland sporozoites            | Rhoptries                                                                     | PF3D7_0511600    | apical rhoptry neck protein (ARNP)                                    |                                      | F20-N179                  | low                   | high                                                          |
|               | 24  | 110974     | Salivary gland sporozoites            | Cell surface                                                                  | PF3D7_0511400    | conserved Plasmodium protein                                          |                                      | S25-T330                  | low                   | medium                                                        |
|               | 25  | 110975     | Salivary gland sporozoites            | Cell surface                                                                  | PF3D7_0812300    | sporozoite surface protein 3 (SSP3)                                   |                                      | E23-P411                  | n.d.                  | medium                                                        |
|               | 26  | 110976     | Salivary gland sporozoites            | Integral component of membrane, symbiont containing vacuole                   | PF3D7_0406200    | sexual stage-specific protein precursor (P516)                        |                                      | D26-R103                  | high                  | medium                                                        |
|               | 27  | 110977     | Salivary gland sporozoites            | Symbiont-containing vacuole membrane                                          | PF3D7_0829600    | early transcribed membrane protein 8 (ETRAMP8)                        | ETRAMP_BLOB.2                        | K25-K52                   | high                  | low                                                           |
|               | 28  | 110978     | Salivary gland sporozoites            | Symbiont-containing vacuole membrane                                          | PF3D7_1016900    | early transcribed membrane protein 10.3 (ETRAMP10.3)                  | PEG4, UIS4                           | L25-Q52                   | high                  | high                                                          |
|               | 29  | 110979     | Salivary gland sporozoites            | Maurer's cleft                                                                | PF3D7_1201300    | liver stage associated protein 1 (LSAP1)                              | ETRAMP_LSAP-1                        | V25-T52                   | high                  | high                                                          |
|               | 30  | 110980     | Salivary gland sporozoites            | unknown                                                                       | PF3D7_0929900    | conserved Plasmodium protein                                          |                                      | Y21-S139                  | low                   | n.d.                                                          |
|               | 31  | 110981     | Salivary gland sporozoites            | unknown                                                                       | PF3D7_1434400    | conserved Plasmodium membrane protein                                 |                                      | N23-N265                  | low                   | medium                                                        |
|               | 32  | 110982     | Salivary gland sporozoites            | unknown                                                                       | PF3D7_0105400.1  | conserved Plasmodium protein                                          |                                      | K21-S85                   | medium                | medium                                                        |
|               | 33  | 110983     | Salivary gland sporozoites            | unknown                                                                       | PF3D7_0108700    | secreted ookinete protein (PSOP24)                                    |                                      | K20-P456                  | medium                | medium                                                        |
|               | 34  | 110984     | Salivary gland sporozoites            | unknown                                                                       | PF3D7_0422100    | transmembrane emp24 domain-containing protein, putative               |                                      | N23-T350                  | medium                | medium                                                        |
|               | 35  | 110985     | Salivary gland sporozoites            | unknown                                                                       | PF3D7_0526900    | transmembrane emp24 domain-containing protein, putative               |                                      | A28-N180                  | medium                | high                                                          |
|               | 36  | 110986     | Salivary gland sporozoites            | unknown                                                                       | PF3D7_0713700    | conserved Plasmodium protein                                          |                                      | D22-P166                  | high                  | high                                                          |
|               | 37  | 110987     | Salivary gland sporozoites            | unknown                                                                       | PF3D7_1123500    | conserved Plasmodium protein                                          |                                      | N24-T1222                 | n.d.                  | low                                                           |
|               | 38  | 110988     | Salivary gland sporozoites            | unknown                                                                       | PF3D7_0505700    | conserved Plasmodium membrane protein                                 |                                      | E22-T515                  | medium                | low                                                           |
| GPI           | 39  | 110989     | Ookinete                              | Micronemes                                                                    | PF3D7_0801300    | von Willebrand factor A-domain related protein (WARP)                 |                                      | R24-S290 (S mutated to A) | low                   | medium                                                        |
|               | 40  | 110990     | Ookinete                              | Membrane                                                                      | PF3D7_1030900    | ookinete surface protein P28                                          | PF528                                | R23-S194                  | high                  | high                                                          |
|               | 41  | 110991     | Ookinete                              | Anchored component of plasma membrane                                         | PF3D7_1031000    | ookinete surface protein P25                                          | PF525                                | K23-T193                  | high                  | high                                                          |
|               | 42  | 110992     | Midgut and Salivary gland sporozoites | Anchored component of plasma membrane, host cell cytoplasm, host cell nucleus | PF3D7_0304600    | circumsporozoite (CS) protein (CSP)                                   | CS, PFCSP                            | M1-S376                   | medium                | medium                                                        |
|               | 43  | 110993     | Midgut and Salivary gland sporozoites | Cell surface                                                                  | PF3D7_0620000    | secreted ookinete protein 25, putative                                | PO58                                 | K25-S485                  | medium                | Clone not available at time of screening, clone available now |
| secreted      | 44  | 110994     | Ookinete                              | Micronemes                                                                    | PF3D7_0315200    | circumsporozoite- and TRAP-related protein (CTRP)                     |                                      | H24-N2114                 | n.d.                  | n.d.                                                          |
|               | 45  | 110995     | Ookinete                              | Micronemes                                                                    | PF3D7_1252200    | chitinase (CHT1)                                                      | PFCHT1                               | H29-H378                  | n.d.                  | low                                                           |
|               | 46  | 110996     | Ookinete                              | Micronemes                                                                    | PF3D7_1340000    | secreted ookinete protein, putative (PSOP7)                           |                                      | L23-F618                  | n.d.                  | low                                                           |
|               | 47  | 110997     | Ookinete                              | Micronemes                                                                    | PF3D7_1404300    | secreted ookinete adhesive protein (SOAP)                             |                                      | K20-C202                  | medium                | high                                                          |
|               | 48  | 110998     | Ookinete                              | Crystalloid, symbiont containing vacuole                                      | PF3D7_1455800    | LCCL domain-containing protein (CCp2)                                 | LAP4                                 | G24-P1617                 | n.d.                  | n.d.                                                          |
|               | 49  | 110999     | Ookinete                              | Crystalloid, symbiont containing vacuole                                      | PF3D7_1475500    | LCCL domain-containing protein (CCp1)                                 | LAP2                                 | Q20-I1620                 | n.d.                  | n/a (not expressed for AVEKIS)                                |

|    |        |                                       |                                           |                 |                                                              |                    |           |                   |                   |
|----|--------|---------------------------------------|-------------------------------------------|-----------------|--------------------------------------------------------------|--------------------|-----------|-------------------|-------------------|
| 50 |        | Midgut Sporozoite                     | Apicoplast                                | PF3D7_1367800   | secreted ookinete protein, putative (PSOP2)                  |                    | E23-I1182 | subcloning failed | subcloning failed |
| 51 | 111000 | Midgut Sporozoite                     | Cell surface                              | PF3D7_0513700   | secreted ookinete protein, putative (PSOP3)                  |                    | F24-I735  | n.d.              | low               |
| 52 | 111001 | Midgut Sporozoite                     | Cytosol, food vacuole                     | PF3D7_1454400   | aminopeptidase P (APP)                                       | PFAPP              | K23-N777  | low               | medium            |
| 53 | 111002 | Midgut and Salivary gland sporozoites | Apical part of cell                       | PF3D7_0408600   | sporozoite invasion associated protein 1 (SIAP-1)            | AG17, PFSIAP-1, S5 | Y22-D984  | n.d.              | low               |
| 54 | 111003 | Midgut and Salivary gland sporozoites | Apicoplast                                | PF3D7_0721700   | secreted ookinete protein (PSOP1)                            |                    | V17-P467  | high              | high              |
| 55 | 111004 | Midgut and Salivary gland sporozoites | Apicoplast                                | PF3D7_1232100   | CPN60                                                        |                    | I24-E718  | medium            | low               |
| 56 | 111005 | Midgut and Salivary gland sporozoites | Microneme                                 | PF3D7_1335900   | thrombospondin-related anonymous protein (TRAP)              | SSP2               | M1-P497   | high              | high              |
| 57 | 111006 | Midgut and Salivary gland sporozoites | Microneme                                 | PF3D7_1342500   | sporozoite protein essential for cell traversal (SPECT1)     | PFSPECT, SPECT     | Y22-S245  | medium            | high              |
| 58 |        | Midgut and Salivary gland sporozoites | Rhoptries                                 | PF3D7_1116000   | rhoptry neck protein 4 (RON4)                                | PFRON4             | F24-L1201 | synthesis failed  | n/a               |
| 59 | 111007 | Midgut and Salivary gland sporozoites | ER                                        | PF3D7_1115600   | peptidyl-prolyl cis-trans isomerase (CYP19B)                 | PFCYP19B           | A22-I195  | low               | medium            |
| 60 | 111008 | Midgut and Salivary gland sporozoites | Cell surface, ER                          | PF3D7_1222300   | endoplasmic, putative (GRP94)                                | HSP90              | D29-L821  | low               | medium            |
| 61 | 111009 | Midgut and Salivary gland sporozoites | unknown                                   | PF3D7_1351800.1 | conserved Plasmodium protein                                 |                    | V20-S230  | high              | high              |
| 62 | 111010 | Salivary gland sporozoites            | Apicoplast, cell periphery                | PF3D7_0721100   | conserved Plasmodium protein                                 |                    | R25-E244  | n.d.              | high              |
| 63 | 111011 | Salivary gland sporozoites            | Apicoplast                                | PF3D7_0729200   | 1-cys peroxiredoxin (AOP)                                    | PISOP, PRX         | F21-L240  | medium            | medium            |
| 64 | 111012 | Salivary gland sporozoites            | Apicoplast                                | PF3D7_1106200   | conserved Plasmodium protein                                 |                    | N17-N681  | n.d.              | low               |
| 65 | 111013 | Salivary gland sporozoites            | Apicoplast                                | PF3D7_1234600   | protein TOC75, putative                                      |                    | K24-L1130 | n.d.              | n/a               |
| 66 | 111014 | Salivary gland sporozoites            | Micronemes                                | PF3D7_1216600   | cell traversal protein for ookinetes and sporozoites (CATOS) |                    | F25-D182  | high              | high              |
| 67 | 111015 | Salivary gland sporozoites            | Micronemes, rhoptry neck                  | PF3D7_1449000   | gamete egress and sporozoite traversal protein (GEST)        |                    | I21-Q248  | low               | low               |
| 68 | 111016 | Salivary gland sporozoites            | Rhoptries                                 | PF3D7_0722200   | rhoptry associated leucine zipper-like protein 1 (RALP1)     |                    | S23-F749  | n.d.              | low               |
| 69 | 111017 | Salivary gland sporozoites            | Cell surface, rhoptries                   | PF3D7_1012200   | rhoptry associated adhesin                                   |                    | E18-K267  | low               | low               |
| 70 | 111018 | Salivary gland sporozoites            | ER                                        | PF3D7_1404900   | conserved Plasmodium protein                                 |                    | R24-L297  | high              | high              |
| 71 | 111019 | Salivary gland sporozoites            | Food vacuole, symbiont-containing vacuole | PF3D7_1116700   | cathepsin C, homolog, dipeptidyl aminopeptidase 1 (DPAP1)    |                    | D28-N700  | n.d.              | medium            |
| 72 | 111020 | Salivary gland sporozoites            | Plasma membrane                           | PF3D7_0317100   | 6-cysteine protein (B9)                                      |                    | G22-F969  | medium            | low               |
| 73 | 111021 | Salivary gland sporozoites            | unknown                                   | PF3D7_0107300   | conserved Plasmodium protein                                 |                    | I23-K399  | n.d.              | low               |
| 74 | 111022 | Salivary gland sporozoites            | unknown                                   | PF3D7_0624400   | conserved Plasmodium protein                                 |                    | D20-K607  | low               | low               |
| 75 | 111023 | Salivary gland sporozoites            | unknown                                   | PF3D7_0702900   | conserved Plasmodium protein                                 |                    | Q24-N107  | high              | high              |
| 76 | 111024 | Salivary gland sporozoites            | unknown                                   | PF3D7_0909200   | GDP fucose protein O-fucosyltransferase 2 (POFUT2)           |                    | V19-T469  | n.d.              | n.d.              |
| 77 | 111025 | Salivary gland sporozoites            | unknown                                   | PF3D7_1242000   | conserved Plasmodium protein                                 |                    | D28-S531  | very low          | low               |

**previously published proteins:**

|                      |                            |                                                            |                                                                 |                                                                   |                                                                    |                           |           |        |                   |
|----------------------|----------------------------|------------------------------------------------------------|-----------------------------------------------------------------|-------------------------------------------------------------------|--------------------------------------------------------------------|---------------------------|-----------|--------|-------------------|
| <b>transmembrane</b> | 78                         | Ookinete                                                   | Rhoptries                                                       | PF3D7_0501500                                                     | rhoptry-associated protein 3 (RAP3)                                |                           | N23-K400  | low    | n.d.              |
|                      | 79                         | Midgut Sporozoite                                          | unknown                                                         | PF3D7_1334600                                                     | MSP7-like protein (MSRP3)                                          |                           | Q24-S298  | low    | medium            |
|                      | 80                         | Midgut and Salivary gland sporozoites                      | Micronemes, rhoptry neck                                        | PF3D7_1133400                                                     | apical membrane antigen 1 (AMA1)                                   | PF83, PFAMA1, RMA1        | Q25-T541  | high   | high              |
|                      | 81                         | Midgut and Salivary gland sporozoites                      | Micronemes, rhoptry neck                                        | PF3D7_0405900                                                     | apical sushi protein (ASP)                                         | RON1                      | A20-S708  | low    | high              |
|                      | 82                         | Midgut and Salivary gland sporozoites                      | Rhoptries                                                       | PF3D7_1017100                                                     | rhoptry neck protein 12 (RON12)                                    |                           | V22-E310  | high   | high              |
|                      | 83                         | Midgut and Salivary gland sporozoites                      | Rhoptries                                                       | PF3D7_1252100                                                     | rhoptry neck protein 3 (RON3)                                      |                           | N22-N249  | n.d.   | n/a               |
|                      | 84                         | Midgut and Salivary gland sporozoites                      | Anchored component of plasma membrane                           | PF3D7_0612800                                                     | 6-cysteine protein (P12p)                                          |                           | Y21-T349  | low    | low               |
|                      | 85                         | Midgut and Salivary gland sporozoites                      | Integral component of membrane                                  | PF3D7_0616500                                                     | TRAP-like protein (TLp)                                            | TRAP2                     | E24-P1306 | low    | high              |
| 86                   | Salivary gland sporozoites | Food vacuole, plasma membrane, symbiont-containing vacuole | PF3D7_0502400                                                   | ring-stage membrane protein 1, merozoite surface protein 8 (MSP8) | RMP1                                                               | E26-S576                  | medium    | high   |                   |
| <b>GPI</b>           | 87                         | Midgut Sporozoite                                          | Anchored component of plasma membrane (cell surface)            | PF3D7_1364100                                                     | 6-cysteine protein (P92)                                           | PF92                      | N27-S770  | n.d.   | low               |
|                      | 88                         | Midgut and Salivary gland sporozoites                      | Anchored component of plasma membrane, cell surface, micronemes | PF3D7_0828800                                                     | GPI-anchored micronemal antigen (GAMA)                             | PSOP9                     | L22-P710  | medium | high              |
|                      | 89                         | Midgut and Salivary gland sporozoites                      | Rhoptries                                                       | PF3D7_0419700                                                     | apical merozoite protein (P34)                                     | PV2                       | N25-S306  | medium | high              |
|                      | 90                         | Salivary gland sporozoites                                 | Anchored component of plasma membrane, cell surface, microneme  | PF3D7_0508000                                                     | 6-cysteine protein (P38)                                           | PF38, P63B                | Q22-S328  | low    | medium            |
|                      | 91                         | Salivary gland sporozoites                                 | Anchored component of plasma membrane                           | PF3D7_0930300                                                     | merozoite surface protein 1 (MSP1)                                 | MSA1, PF190, PF195, PMMSA | V20-S1701 | high   | high              |
|                      | 92                         | Salivary gland sporozoites                                 | Rhoptries                                                       | PF3D7_0707300                                                     | rhoptry-associated membrane antigen (RAMA)                         |                           | Y17-K838  | medium | low               |
| <b>secreted</b>      | 93                         | Ookinete                                                   | unknown                                                         | PF3D7_1335000                                                     | MSP7-like protein (MSRP1)                                          |                           | Y22-T379  | high   | low               |
|                      | 94                         | Midgut and Salivary gland sporozoites                      | Rhoptries                                                       | PF3D7_0214900                                                     | rhoptry neck protein 6 (RON6)                                      |                           | F16-T949  | low    | low               |
|                      | 95                         | Midgut and Salivary gland sporozoites                      | Rhoptries                                                       | PF3D7_0501600                                                     | rhoptry-associated protein 2 (RAP2)                                |                           | D22-L398  | n.d.   | n/a               |
|                      | 96                         | Midgut and Salivary gland sporozoites                      | Rhoptries                                                       | PF3D7_0905400                                                     | high molecular weight rhoptry protein 3 (RHOP3)                    |                           | K25-L897  | low    | medium            |
|                      | 97                         | Salivary gland sporozoites                                 | Cell surface, rhoptries, micronemes                             | PF3D7_0212600                                                     | secreted protein with altered thrombospondin repeat domain (SPATR) |                           | E22-C250  | high   | high              |
|                      | 98                         | Salivary gland sporozoites                                 | Rhoptries                                                       | PF3D7_0302200                                                     | cytoadherence linked asexual protein 3.2 (CLAG3.2)                 | RhopH1                    | K21-H1416 | n.d.   | subcloning failed |
|                      | 99                         | Salivary gland sporozoites                                 | Rhoptries                                                       | PF3D7_0929400                                                     | high molecular weight rhoptry protein 2 (RHOP2)                    |                           | L20-S1378 | n.d.   | n.d.              |
|                      | 100                        | Salivary gland sporozoites                                 | Rhoptries                                                       | PF3D7_1410400                                                     | rhoptry-associated protein 1 (RAP1)                                | PFRAP-1, PFRAP1, RAP-1    | I23-D728  | n.d.   | low               |
|                      | 101                        | Salivary gland sporozoites                                 | Anchored component of plasma membrane (cell surface)            | PF3D7_0404900                                                     | 6-cysteine protein (P41)                                           | PF41, P641                | K21-S378  | high   | high              |
|                      | 102                        | Salivary gland sporozoites                                 | unknown                                                         | PF3D7_1404700                                                     | conserved Plasmodium protein                                       |                           | Q21-K290  | low    | low               |



**Table S2. Primer sequences for cloning and genotyping**

| <b>Primer name</b>           | <b>sequence</b>                                                   |
|------------------------------|-------------------------------------------------------------------|
| <b>cloning:</b>              |                                                                   |
| <i>Pb 0522500-3UTR-Xho-F</i> | agaCTCGAGGAATTGCGGCCGCACCAATTATATTATATCCACA                       |
| <i>Pb 0522500-3UTR-Sac-R</i> | agaCCGCGGCATCATACAAATAAACTTGG                                     |
| <i>Pb 0522500-5UTR-Kpn-F</i> | agaGGTACCGGGCACACCAACTGACGCGCACGAATTACAATACCTCGAAAATATGTATTC      |
| <i>Pb 0522500-5UTR-Xma-R</i> | agaCCCGGGGCGGCCGCTTTGATAGAATGCATTGCTAGCTA                         |
| <i>Pb 1241700-3UTR-Xho-F</i> | agaCTCGAGGAATTGCGGCCGCAGATCATACTTTTGTGAACATTTTTGTT                |
| <i>Pb 1241700-3UTR-Sac-R</i> | agaCCGCGGAAAGGAATAATATTGATTGGATATTTA                              |
| <i>Pb 1241700-5UTR-Kpn-F</i> | agaGGTACCATAAGCTTTTCTGACGCGCACGAATTAACAACCTTCATAATAAAAAAATTATTAAG |
| <i>Pb 1241700-5UTR-Xma-R</i> | agaCCCGGGGCGGCCGCGATATAATTTTATGTTTCTGTTTTTTTTAGTATG               |
| <b>genotyping:</b>           |                                                                   |
| <i>Pb PIESP15-fwd2</i>       | GGTTACATAAAGTCAGGAT                                               |
| <i>Pb PIESP15-rev2</i>       | GAATCCTGACTTTATGTAAC                                              |
| <i>Pb PIESP15-QCR1</i>       | TTTGTGACTCCCCCTCACA*                                              |
| <i>Pb PIESP15-QCR2</i>       | TTTCCAAAGCTTATGCGGCA*                                             |
| <i>Pb PIESP15-GT</i>         | AGGCTACTCGAAAATGGCAAGCA*                                          |
| <i>Pb ANKA_0800600-QCR1</i>  | TCCTCTGCGTCAATTAAGCCT*                                            |
| <i>Pb ANKA_0800600-QCR2</i>  | GCAAGCGCCCTCTTATTTATGT*                                           |
| <i>Pb ANKA_0800600-GT</i>    | TGTTCCCTTTGCGTCATGGTT*                                            |
| <i>Pb 0522500-QCR1</i>       | TTGTATATACAATTCACC                                                |
| <i>Pb 0522500-QCR2</i>       | TGAAGCTATTAACGATGATAG                                             |
| <i>Pb 0522500-GT</i>         | GTTAGCATCACTTAAGATAG                                              |
| <i>Pb 1241700-QCR1</i>       | TATAGCATTTTAATCTTTA                                               |
| <i>Pb 1241700-QCR2</i>       | TTCCACATATAAGAACGAGTG                                             |
| <i>Pb 1241700-GT</i>         | GAGCTGGCAGCATATTTGTC                                              |
| Universal GW2a               | CGACAGAGGTCTAGATG                                                 |
| Universal GW2b               | CAAGTATCTAGTCCAGG                                                 |

\* = primer sequences were obtained from the PlasmogEM web page
